# Supplementary material
Source: publisher figshare collection journal article supplement (https://acs.figshare.com/ndownloader/files/5118208)

## Supporting Information

### Synthesis, Electrochemical and Photophysical Studies of Tetrathiafulvalene-annulated Phthalocyanines

Claudia Loosli,<sup>†</sup> Chunyang Jia,<sup>†</sup> Shi-Xia Liu,<sup>†</sup> Marco Haas,<sup>†</sup> Marylène Dias,<sup>‡</sup> Eric Levillain,<sup>‡</sup> Antonia  
Neels,<sup>§</sup> Gael Labat,<sup>§</sup> Andreas Hauser,<sup>||</sup> and Silvio Decurtin<sup>\*,†</sup>

#### Table of Contents

|                                                                                   |       |
|-----------------------------------------------------------------------------------|-------|
| General experimental methods                                                      | S2    |
| Procedure for Preparation of compound <b>1</b>                                    | S3    |
| Procedure for Preparation of compound <b>3</b>                                    | S3    |
| <sup>1</sup> H and <sup>13</sup> C NMR Spectra of Compounds <b>2</b> and <b>4</b> | S4-S5 |
| Thin Layer Cyclic Voltammogram of <b>6-8</b>                                      | S6    |
| UV-Vis Spectra of <b>5-8</b>                                                      | S7    |

**General Experimental Procedures.**  $^1\text{H}$  and  $^{13}\text{C}$  NMR spectra were recorded at 300 and 75 MHz, respectively, with TMS as internal reference. Dithranol and DCTB were used as matrices for MALDI mass spectrometry. Luminescence and excitation spectra of **8** in THF were recorded using a right-angle detection geometry. Sample concentrations were kept low enough for optical densities to be below 0.2 at all wavelengths of interest in order to keep effects of reabsorption negligible. All spectra were corrected for the spectral response of the system. Melting points are uncorrected. Electrochemical experiments were carried out using a potentiostat with positive feedback compensation. The equipment consists of a three-electrode cell with a platinum millielectrode of  $0.126\text{ cm}^2$  and a platinum wire counter-electrode; a silver wire served as a quasi-reference electrode and its potential has been checked against the  $\text{Fc}^+/\text{Fc}$  couple before and after each experiment. The electrolytic media involved a mixture of  $\text{CH}_2\text{Cl}_2$  and  $\text{CH}_3\text{CN}$  (9.5/0.5) and a 0.1 M solution of tetrabutylammonium hexafluorophosphate ( $\text{TBAPF}_6$ ). All experiments were performed in a glove box containing dry, oxygen-free argon at room temperature. The number of electrons was determined by thin-layer cyclic voltammetry (TLCV) using 2,3-dichloro-1,4-naphthoquinone as the one-electron standard reference.

Procedure for Preparation of compound **1**: To a suspension of NaH (0.6 g, 25 mmol) in anhydrous DMF (10 ml) under Ar at room temperature, benzyl mercaptan (3 ml, 25 mmol) was added in one portion. After completion of reaction the milky suspension became a transparent solution. Then 4,5-dichlorophthalonitrile (2.5 g, 12.5 mmol) was added in one portion and the mixture was kept stirring for 12h. The resulting yellow solution was cooled (-20°C) for some time (at least 1 day) until a yellow solid was formed which was collected by filtration and washed with DMF. The crude product was dissolved in dichloromethane (40 ml). After filtration, methanol (100 ml) was added until precipitation. Compound **1** was collected as a white solid (2.6 g, 55 %). mp: 190-191°C ; <sup>1</sup>H NMR (CD<sub>2</sub>Cl<sub>2</sub>): δ 7.47 (s, 2H), 7.34 (m, 10H), 4.24 (s, 4H); EI-MS *m/z* (relative intensity, %) 372 (M<sup>+</sup>, 14).

Procedure for Preparation of compound **3**: To a solution of di(tetraethylammonium) bis(1,3-dithiol-2-thione-4,5-dithiolate)zincate (5.00 g, 7.0 mmol) in acetonitrile was added 3-bromopropane (2.5 mL, 2.8 mmol) and the mixture was refluxed for 1 h. The resulting solution was cooled to r.t. and the precipitated salt was filtered off. The yellow-orange filtrate was concentrated in vacuo, the crude product was redissolved in CH<sub>2</sub>Cl<sub>2</sub> (80 mL) and washed with water (4 x 60 mL), dried (Na<sub>2</sub>SO<sub>4</sub>) and the solvent was removed under reduced pressure. Purification by means of column chromatography (silica, CH<sub>2</sub>Cl<sub>2</sub>/hexane 1/1) afforded compound **3** as a red oil (3.2 g, 80%). <sup>1</sup>H NMR (CDCl<sub>3</sub>): δ 2.87 (t, 4H, *J* = 7.14 Hz), 1.75 (m, 4H, *J* = 7.14 Hz, *J* = 7.35 Hz), 1.05 (t, 6H, *J* = 7.35 Hz); EI-MS *m/z* (relative intensity, %) 282 (M<sup>+</sup>, 52).

## NMR Spectra

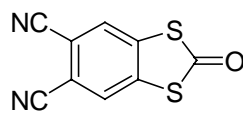

**2**

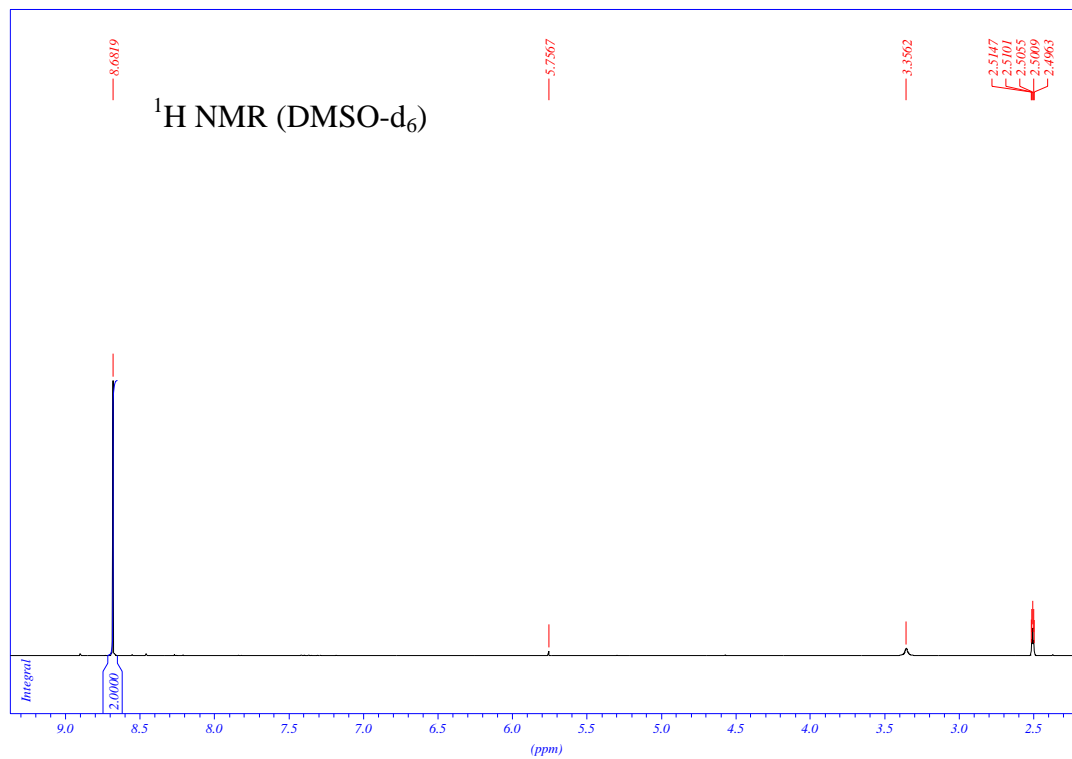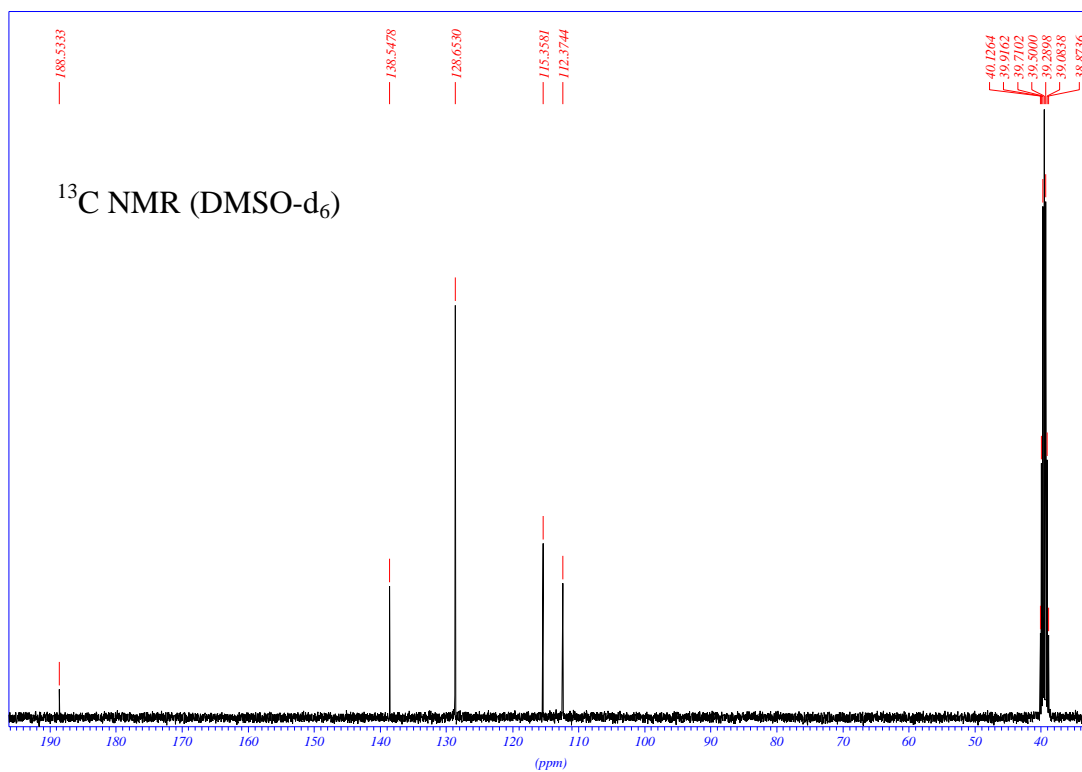

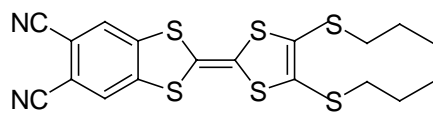

4

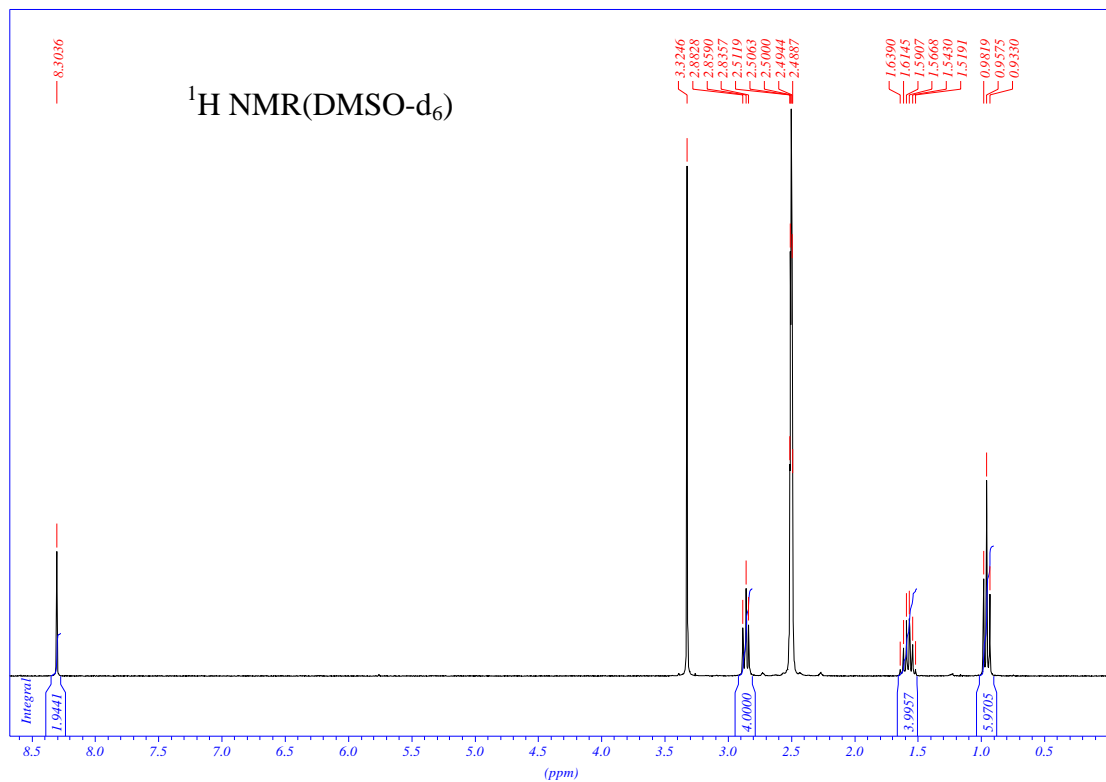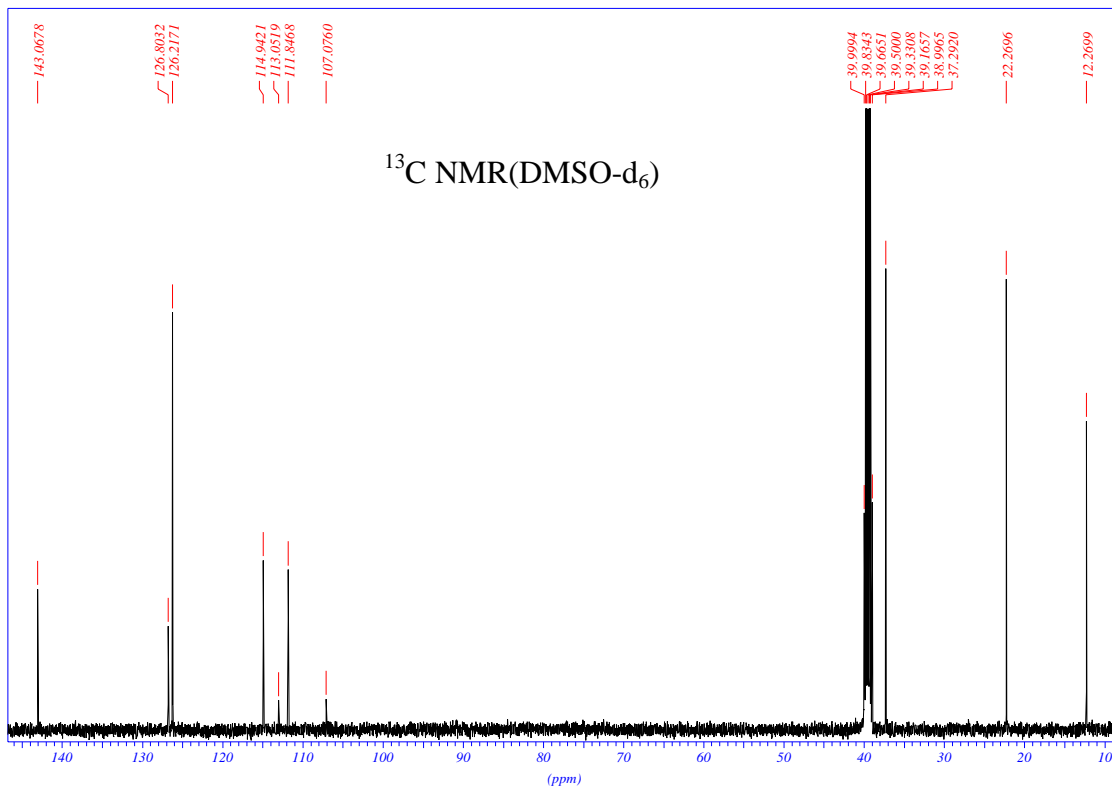

## Thin Layer Cyclic Voltammogram

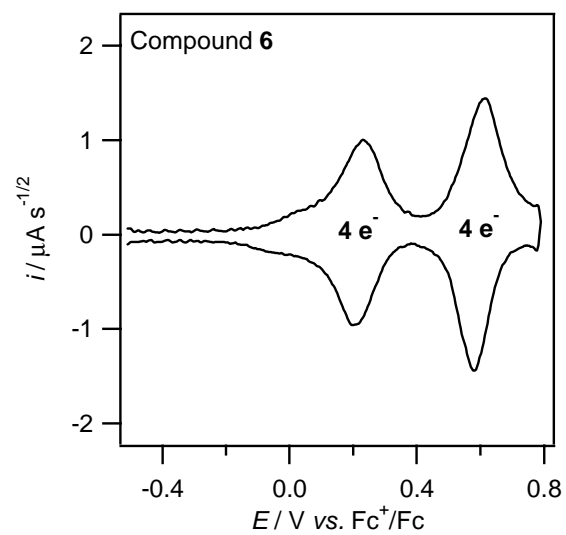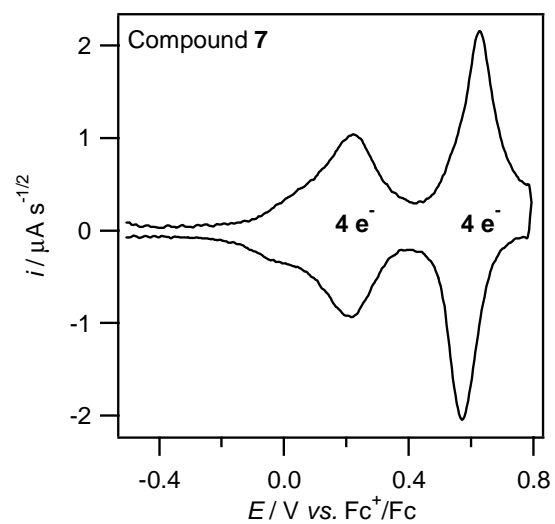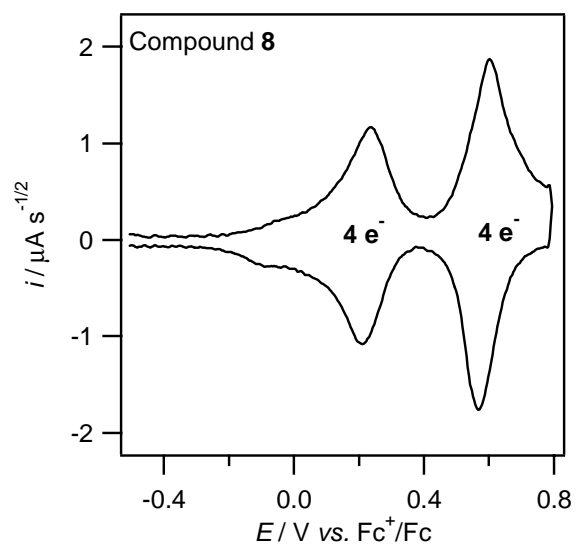

**UV-Vis spectra of compounds 5 (d), 6 (b), 7(c) and 8 (a) in pyridine**

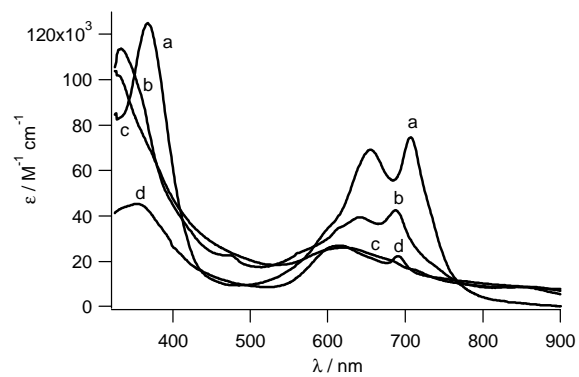

Supplement: Supplementary file 1 [file 5118208]
